# Supplementary material for: Quantifying Contributions of Local Emissions and Regional Transport to NOX in Beijing Using TROPOMI Constrained WRF-Chem Simulation
Source: MDPI journal article supplement (doi:10.3390/rs13091798), 2021-05-05
Supplement: s1 [file s1]

Supplement of

# Quantifying Contributions of Local Emissions and Regional Transport to NO<sub>x</sub> in Beijing using TROPOMI Constrained WRF-Chem Simulation

Yizhi Zhu <sup>1,2</sup>, Qihou Hu <sup>1,\*</sup>, Meng Gao <sup>3</sup>, Chun Zhao <sup>4</sup>, Chengxin Zhang <sup>2</sup>, Ting Liu <sup>4</sup>, Yuan Tian <sup>5</sup>, Liu Yan <sup>6</sup>, Wenjing Su <sup>4</sup>, Xinhua Hong <sup>7</sup>, Cheng Liu <sup>1,2,8,9,10</sup>

- <sup>1</sup> Key Lab of Environmental Optics & Technology, Anhui Institute of Optics and Fine Mechanics, Chinese Academy of Sciences, Hefei, 230031, China; [yzz2017@mail.ustc.edu.cn](mailto:yzz2017@mail.ustc.edu.cn) (Y.Z.); [chliu81@ustc.edu.cn](mailto:chliu81@ustc.edu.cn) (C.L.)
  - <sup>2</sup> Department of Precision Machinery and Precision Instrumentation, University of Science and Technology of China, Hefei, 230026, China
  - <sup>3</sup> Department of Geography, Hong Kong Baptist University, Hong Kong SAR, 999077, China; [mmgao2@hkbu.edu.hk](mailto:mmgao2@hkbu.edu.hk)
  - <sup>4</sup> School of Earth and Space Sciences, University of Science and Technology of China, Hefei, 230026, China; [chunzhao@ustc.edu.cn](mailto:chunzhao@ustc.edu.cn) (C.Z.); [swj1993@mail.ustc.edu.cn](mailto:swj1993@mail.ustc.edu.cn) (W.S.)
  - <sup>5</sup> Institute of Physical Science and Information Technology, Anhui University, Hefei 230601, China; [ytian@ahu.edu.cn](mailto:ytian@ahu.edu.cn)
  - <sup>6</sup> Department of Earth System Science, Tsinghua University, 100084 Beijing, China; [yanliu17@mails.tsinghua.edu.cn](mailto:yanliu17@mails.tsinghua.edu.cn)
  - <sup>7</sup> School of Environmental Science and Optoelectronic Technology, University of Science and Technology of China, Hefei 230026, China; [xinhua95@mail.ustc.edu.cn](mailto:xinhua95@mail.ustc.edu.cn)
  - <sup>8</sup> Anhui Province Key Laboratory of Polar Environment and Global Change, University of Science and Technology of China, Hefei 230026, China
  - <sup>9</sup> Center for Excellence in Regional Atmospheric Environment, Institute of Urban Environment, Chinese Academy of Sciences, Xiamen 361021, China
  - <sup>10</sup> Key Laboratory of Precision Scientific Instrumentation of Anhui Higher Education Institutes, University of Science and Technology of China, Hefei 230026, China
- \* Correspondence: [qhhu@aiofm.ac.cn](mailto:qhhu@aiofm.ac.cn)

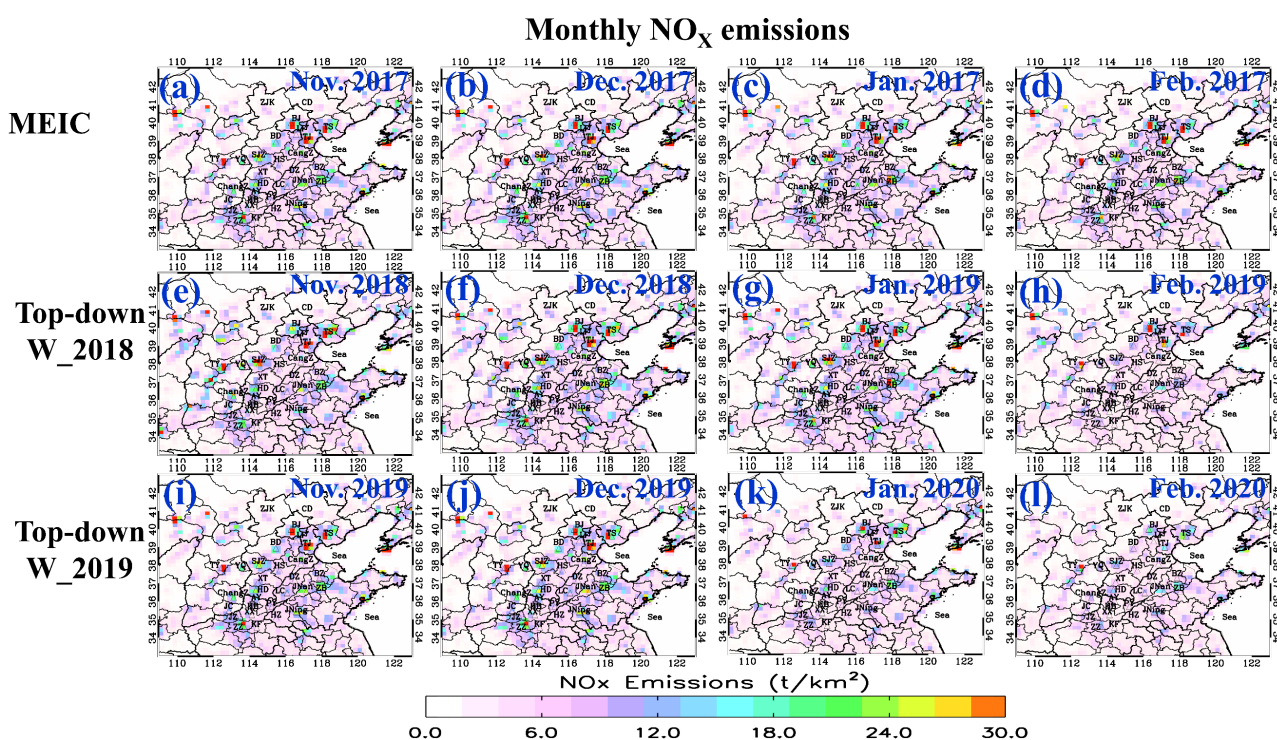

**Figure S1.** Monthly NO<sub>x</sub> emissions. (a–d) Taken from the MEIC-2017. (e–h) Top-down NO<sub>x</sub> emissions derived from TROPOMI NO<sub>2</sub> VCDs in W\_2018. (i–l) Same as (e–h) except in W\_2019.

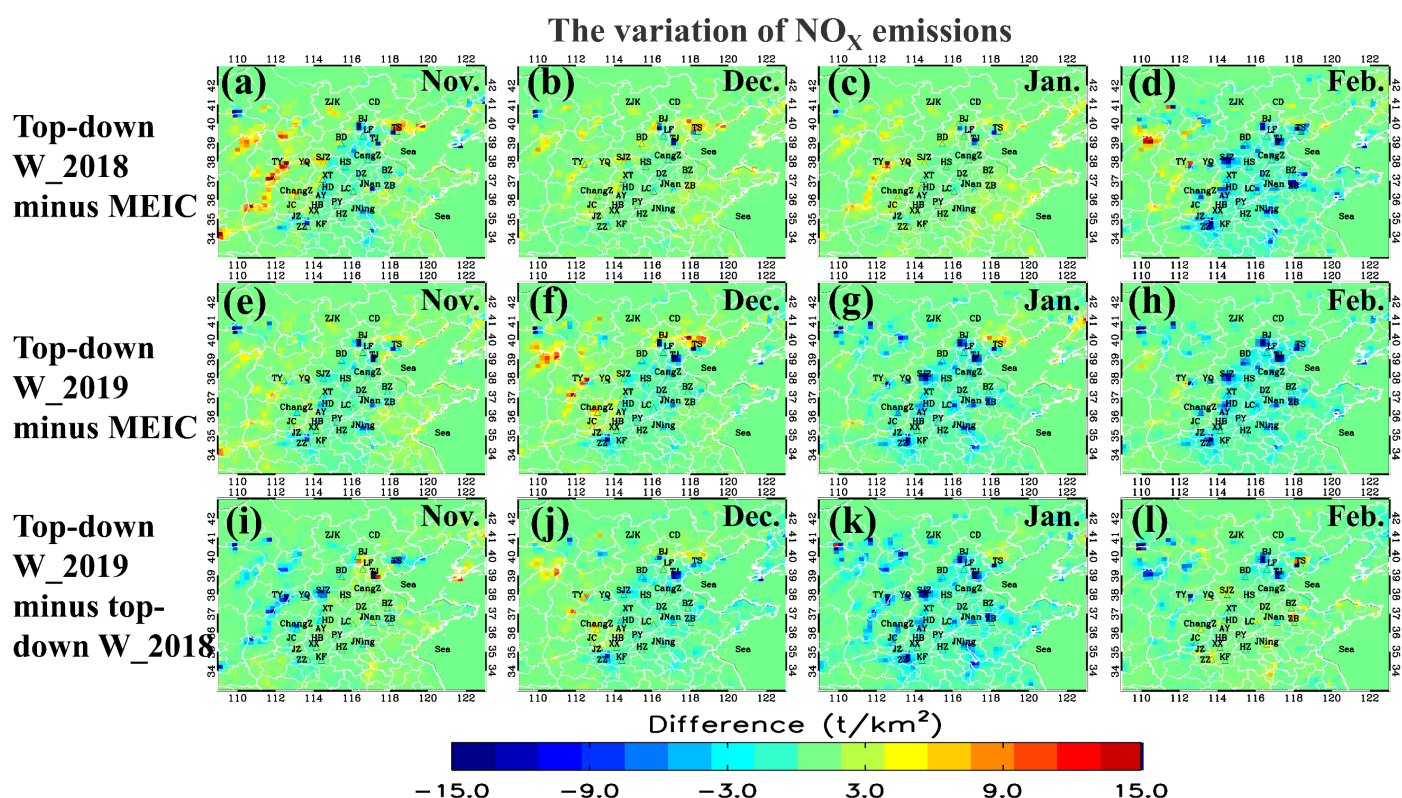

**Figure S2.** Difference in surface NO<sub>x</sub> emissions between MEIC-2017 and top-down NO<sub>x</sub> emissions (a–h); (i–l) Change in surface NO<sub>x</sub> emissions between top-down W\_2018 and top-down W\_2019.

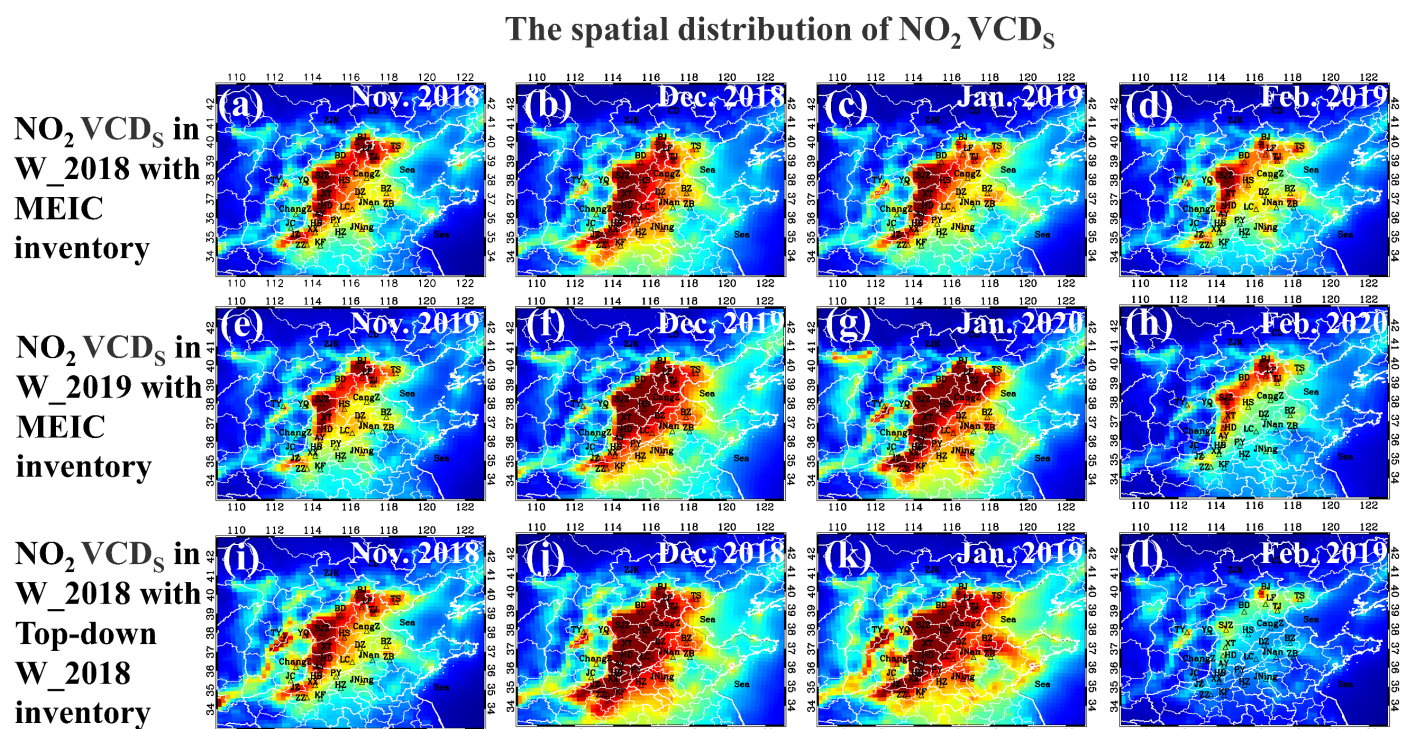



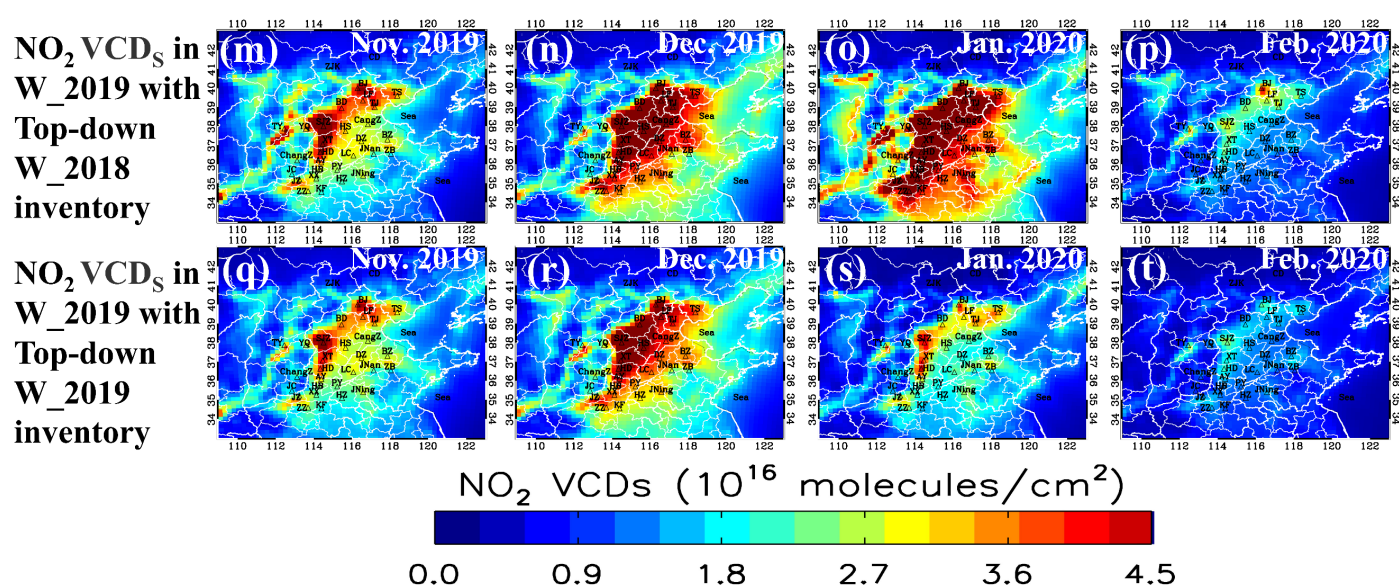

**Figure S3.** Monthly averaged tropospheric NO<sub>2</sub> VCDs simulated from MEIC-2017 (a–h) and top-down NO<sub>x</sub> emissions (i–t). Note that, (a–d) and (i–l) using same meteorological condition (W<sub>2018</sub>), while the different NO<sub>x</sub> inventories. (e–h) and (m–t) also using same meteorological condition (W<sub>2019</sub>), while the different NO<sub>x</sub> inventories.

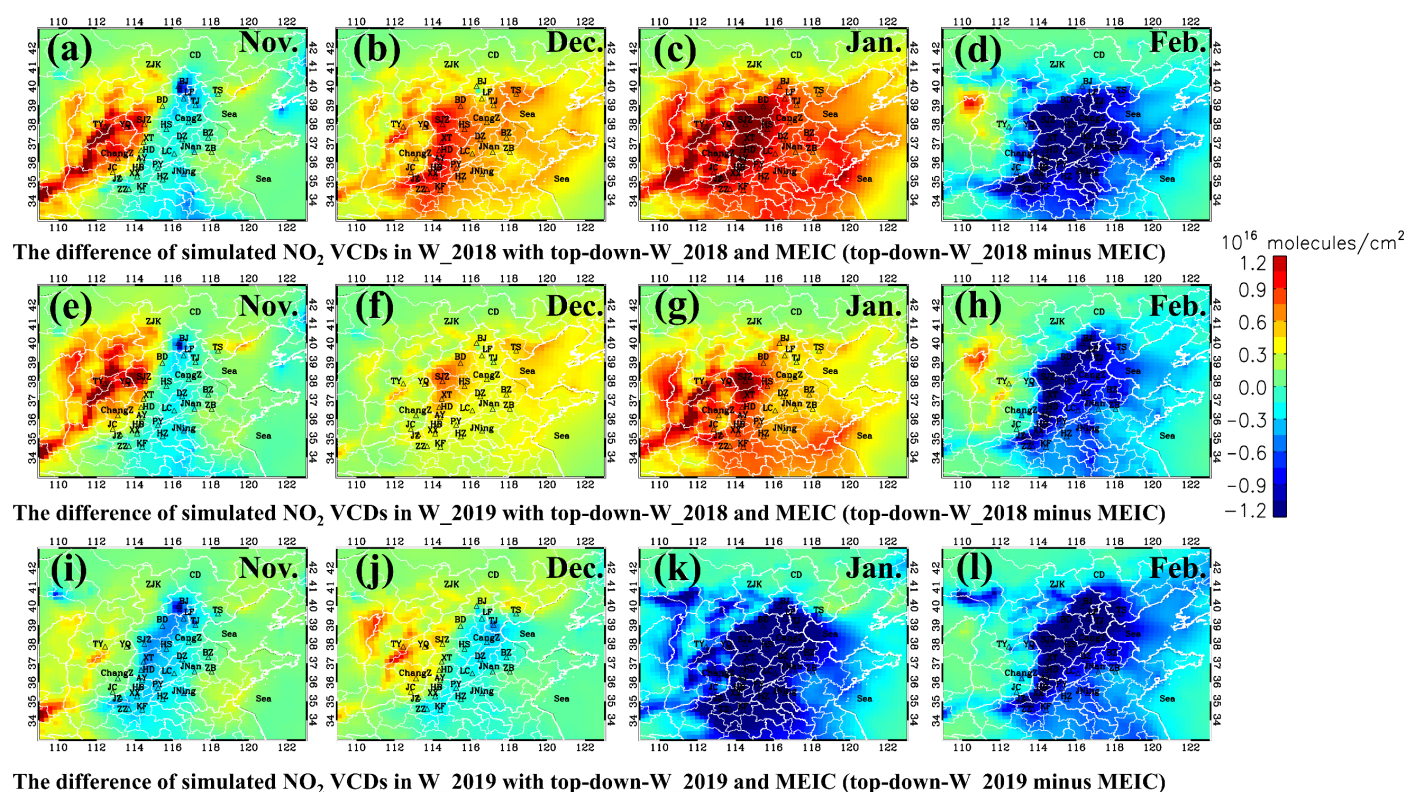

**Figure S4.** Variation in monthly averaged tropospheric NO<sub>2</sub> VCDs simulated from MEIC-2017 and top-down NO<sub>x</sub> emissions. Note that, (a–d) using the meteorological condition in W<sub>2018</sub>, while (e–l) using same meteorological condition (W<sub>2019</sub>).

### The regional transport flux of NO<sub>2</sub>

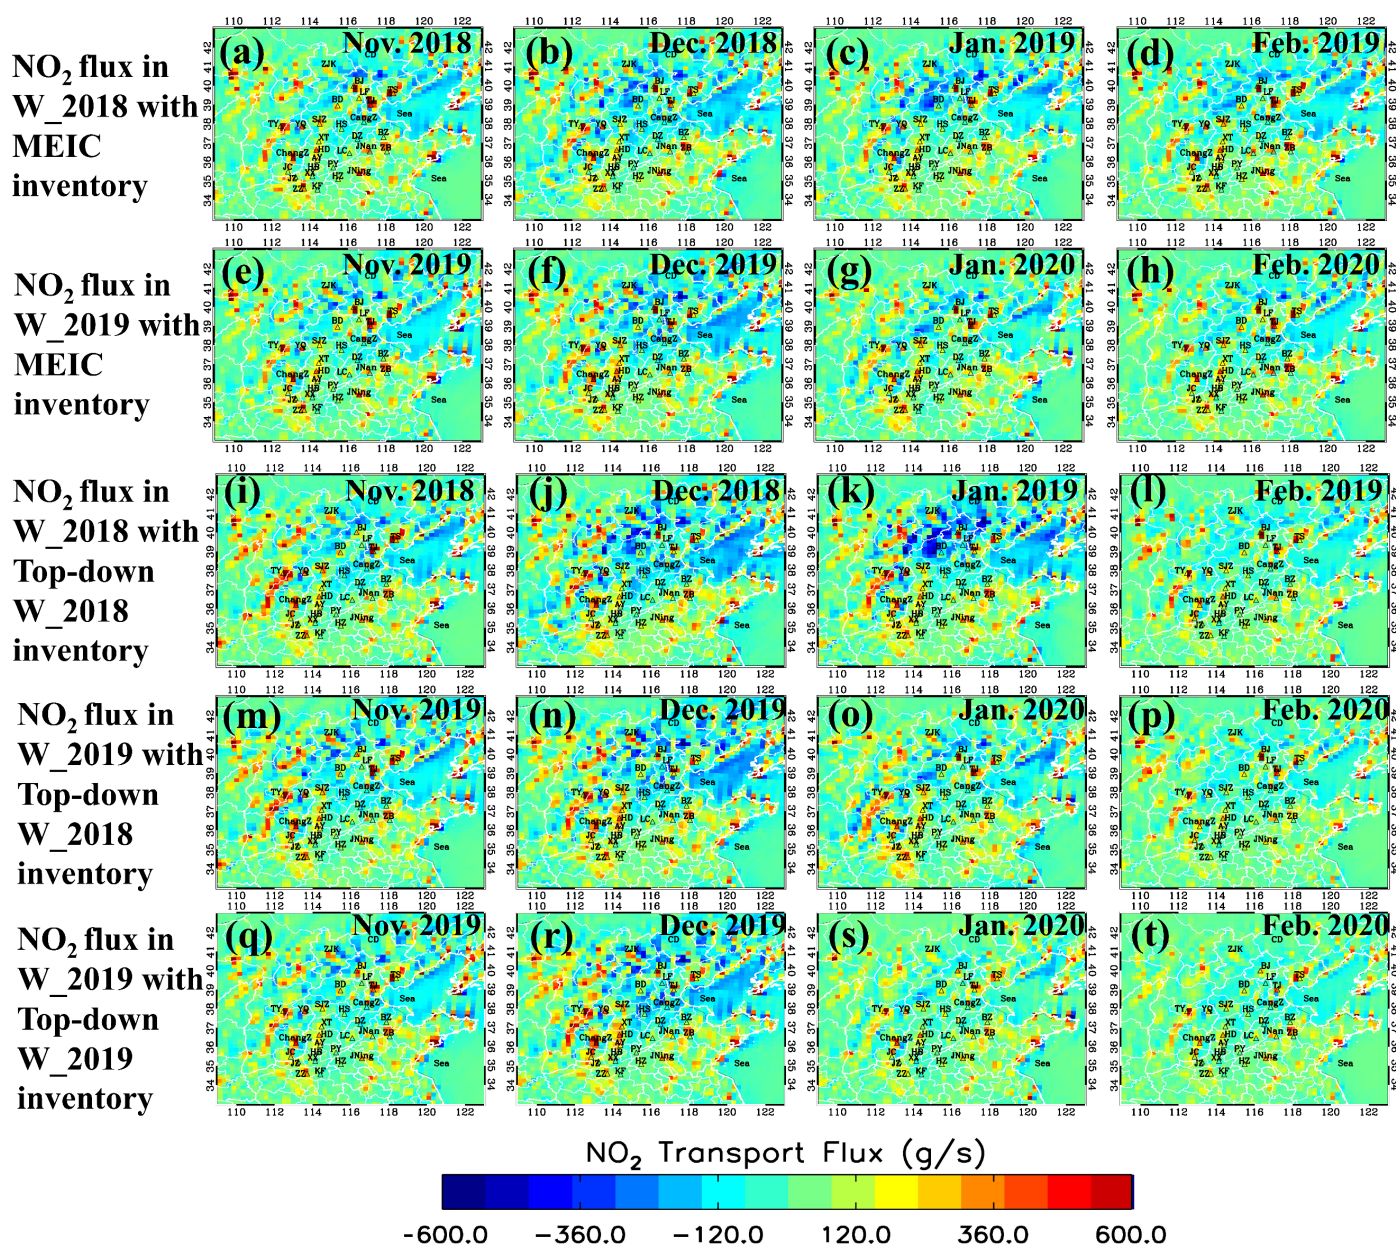

**Figure S5.** Monthly tropospheric NO<sub>2</sub> regional transport flux drive from MEIC-2017 (a–h) and top-down NO<sub>x</sub> emissions (i–t). Note that, (a–d) and (i–l) using same meteorological condition (W\_2018), while the different NO<sub>x</sub> inventories. (e–h) and (m–t) also using same meteorological condition (W\_2019), while the different NO<sub>x</sub> inventories.



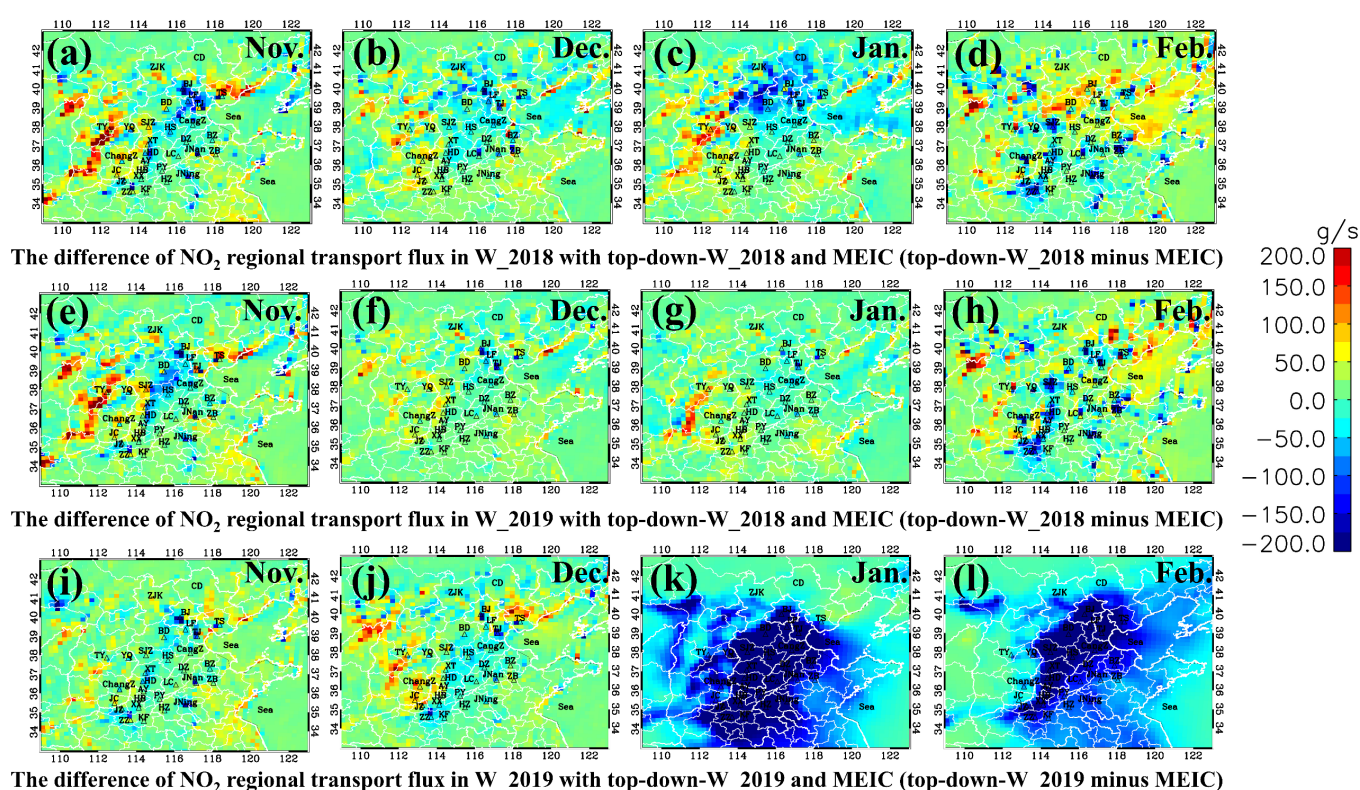

**Figure S6.** Variation in monthly averaged tropospheric  $\text{NO}_2$  regional transport flux drive from MEIC-2017 and top-down  $\text{NO}_x$  emissions. Note that, (a–d) using the meteorological condition in W\_2018, while (e–l) using same meteorological condition (W\_2019).
