# Supplementary material for: Quantifying Contributions of Local Emissions and Regional Transport to NOX in Beijing Using TROPOMI Constrained WRF-Chem Simulation
Source: MDPI journal article supplement (doi:10.3390/rs13091798), 2021-05-05
Supplement: s1 [file s1]

Archive with 1 entries (1 files):
- remotesensing-1196834-supplementary.pdf
